# Supplementary material for: Biliverdin/Bilirubin Redox Pair Protects Lens Epithelial Cells against Oxidative Stress in Age‐Related Cataract by Regulating NF‐κB/iNOS and Nrf2/HO‐1 Pathways
Source: Hindawi journal article supplement (doi:10.1155/2022/7299182), 2022-01-01
Supplement: f2 [file 7299182.f2.pdf]

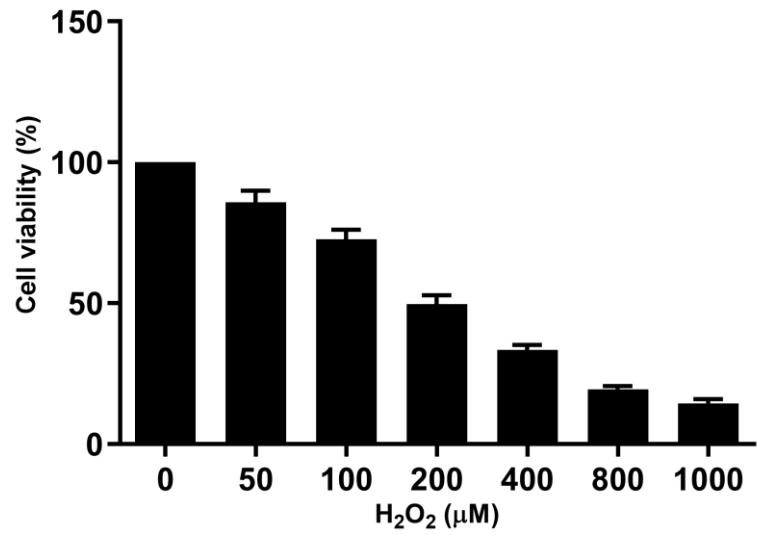

(a)

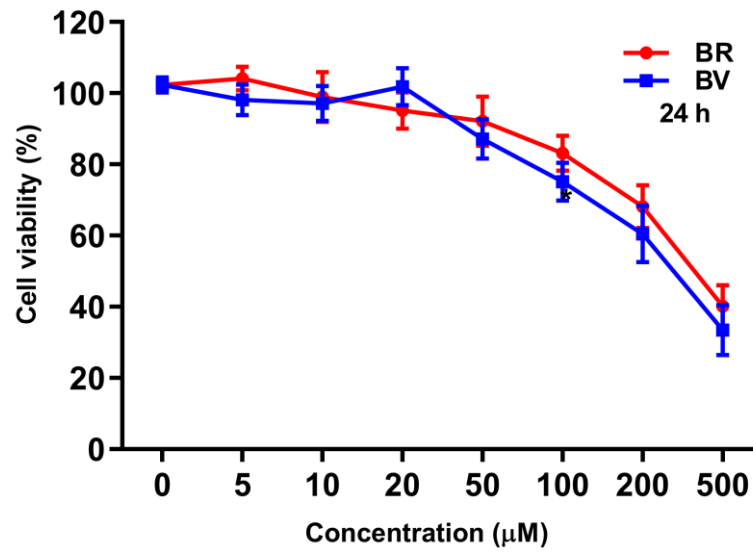

(b)

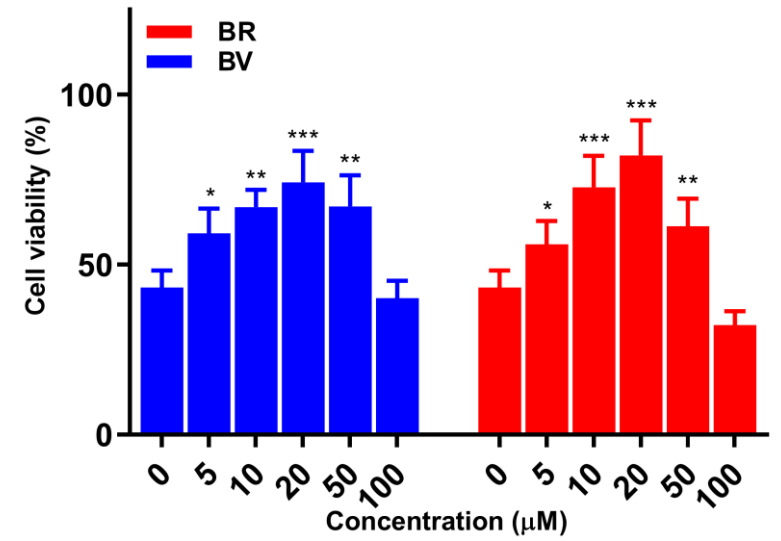

(c)
